# Supplementary material for: A systematic review of ginsenoside biosynthesis, spatiotemporal distribution, and response to biotic and abiotic factors in American ginseng
Source: Royal Society of Chemistry journal article supplement (doi:10.1039/d3fo03434h), 2024-01-01
Supplement: d3fo03434h1.pdf [file d3fo03434h1.pdf]

Table S1 Lists of identified genes involved in ginsenoside biosynthesis in American ginseng

| NO. | Genes                                              | Abbreviation     | Accession no.(protein or gene) |
|-----|----------------------------------------------------|------------------|--------------------------------|
| 1   | 3-Hydroxy-3-methylglutaryl<br>coenzyme A reductase | PqHMGR           | FJ755158(ACV65036)             |
| 2   | Farnesyl diphosphate<br>synthase                   | PqFPS            | GQ401664(ADJ68004)             |
| 3   | Squalene synthase                                  | PqSS1            | GU997681(AED99863)             |
| 4   | Squalene synthase                                  | PqSS2            | AM182456(CAJ58418)             |
| 5   | Squalene synthase                                  | PqSS3            | AM182457(CAJ58419)             |
| 6   | Squalene epoxidase                                 | PqSE             | KC524469(AGK62446)             |
| 7   | $\beta$ -amyrin synthase                           | Pq $\beta$ -AS1  | JX185490(AGG09938)             |
| 8   | $\beta$ -amyrin synthase                           | Pq $\beta$ -AS1  | JX262290(AGG09939)             |
| 9   | Dammarendiol synthase                              | PqDDS            | KC316048(AGI15962)             |
| 10  | Cytochrome P450                                    | PqPPDS (PqD12H)  | JX569336(AFU93031)             |
| 11  | Cytochrome P450                                    | PqPPTS (PqCYP6H) | KC190491 (AGC31652)            |
| 12  | UDP-glycosyltransferase                            | Pq3-OUGT1        | No. KR028477                   |
| 13  | UDP-glycosyltransferase                            | Pq3-OUGT2        | No. KR106207                   |

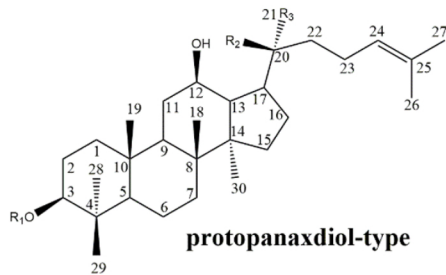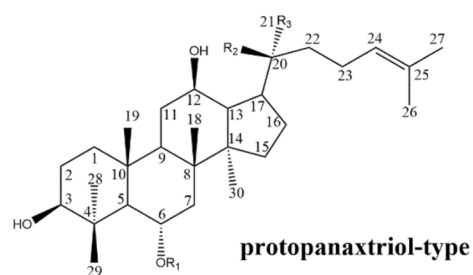

| No. | Name                    | R1                                                          | R2                                        | R3              |
|-----|-------------------------|-------------------------------------------------------------|-------------------------------------------|-----------------|
| 1   | Ginsenoside Rb1         | Glc <sup>2</sup> -Glc                                       | O-Glc <sup>6</sup> -Glc                   | CH <sub>3</sub> |
| 2   | Ginsenoside Rb2         | Glc <sup>2</sup> -Glc                                       | O-Glc <sup>6</sup> -Ara(p)                | CH <sub>3</sub> |
| 3   | Ginsenoside Rb3         | Glc <sup>2</sup> -Glc                                       | O-Glc <sup>6</sup> -xyl                   | CH <sub>3</sub> |
| 4   | Ginsenoside Rc          | Glc <sup>2</sup> -Glc                                       | O-Glc <sup>6</sup> -Ara(f)                | CH <sub>3</sub> |
| 5   | Ginsenoside Rd          | Glc <sup>2</sup> -Glc                                       | O-Glc                                     | CH <sub>3</sub> |
| 6   | 20(S)-Ginsenoside Rh2   | Glc                                                         | OH                                        | CH <sub>3</sub> |
| 7   | 20(R)-Ginsenoside Rh2   | Glc                                                         | CH <sub>3</sub>                           | OH              |
| 8   | 20(S)-Ginsenoside Rg3   | Glc <sup>2</sup> -Glc                                       | OH                                        | CH <sub>3</sub> |
| 9   | 20(R)-Ginsenoside Rg3   | Glc <sup>2</sup> -Glc                                       | CH <sub>3</sub>                           | OH              |
| 10  | Ginsenoside F2          | Glc                                                         | O-Glc                                     | CH <sub>3</sub> |
| 11  | Ginsenoside Rs1         | Glc <sup>2</sup> -Glc <sup>6</sup> -Ac                      | O-Glc <sup>6</sup> -Arap                  | CH <sub>3</sub> |
| 12  | Ginsenoside Ra1         | Glc <sup>2</sup> -Glc <sup>6</sup>                          | O-Glc <sup>6</sup> -Arap <sup>+</sup> xyl | CH <sub>3</sub> |
| 13  | Ginsenoside Ra2         | Glc <sup>2</sup> -Glc                                       | O-Glc <sup>6</sup> -Araf <sup>+</sup> xyl | CH <sub>3</sub> |
| 14  | Ginsenoside Rao         | (Glc <sup>2</sup> -Glc) <sup>2</sup> -Glc                   | Glc <sup>6</sup> -Glc                     | CH <sub>3</sub> |
| 15  | 20(S)-Ginsenoside Rs3   | Glc <sup>2</sup> -Glc <sup>6</sup> -Ac                      | OH                                        | H               |
| 16  | 20(R)-Ginsenoside Rs3   | Glc <sup>2</sup> -Glc <sup>6</sup> -Ac                      | H                                         | OH              |
| 17  | Malonyl-ginsenoside Rb1 | Glc <sup>2</sup> -Glc <sup>6</sup> -M                       | O-Glc <sup>6</sup> -Glc                   | CH <sub>3</sub> |
| 18  | Malonyl-ginsenoside Rb2 | Glc <sup>2</sup> -Glc <sup>6</sup> -M                       | O-Glc <sup>6</sup> -arap                  | CH <sub>3</sub> |
| 19  | Malonyl-ginsenoside Rc  | Glc <sup>2</sup> -Glc <sup>6</sup> -M                       | O-Glc <sup>6</sup> -araf                  | CH <sub>3</sub> |
| 20  | Malonyl-ginsenoside Rd  | Glc <sup>2</sup> -Glc <sup>6</sup> -M                       | O-Glc                                     | CH <sub>3</sub> |
| 21  | Pseudo-ginsenoside RC1  | Glc <sup>2</sup> -Glc <sup>6</sup> -Ac                      | O-Glc                                     | CH <sub>3</sub> |
| 22  | Pseudo-ginsenoside F8   | Glc <sup>2</sup> -Glc <sup>6</sup> - <sup>1</sup> Glc<br>Ac | O-Glc-arap                                | CH <sub>3</sub> |
| 23  | Gypenoside X VII        | Glc                                                         | O-Glc <sup>6</sup> -Glc                   | CH <sub>3</sub> |
| 24  | Gypenoside IX           | Glc                                                         | O-Glc <sup>6</sup> -xyl                   | CH <sub>3</sub> |
| 25  | Notoginsenoside Fe      | Glc                                                         | O-Glc <sup>6</sup> -araf                  | CH <sub>3</sub> |
| 26  | Quinquenoside L5        | Glc <sup>2</sup> -Glc                                       | -Xyl                                      | OH              |
| 27  | Quinquenoside L6        | Glc <sup>2</sup> -Glc                                       | Glc                                       | =O              |
| 28  | Quinquenoside L10       | Glc                                                         | Glc <sup>6</sup> -Ara(p)                  | OH              |
| 29  | Quinquenoside L14       | Glc <sup>2</sup> -Glc                                       | Ara(p)                                    | OH              |
| 30  | Quinquenoside R1        | Glc <sup>2</sup> -Glc <sup>6</sup> -Ac                      | Glc <sup>6</sup> -Glc                     | OH              |
| 31  | Quinquenoside I         | Butenoyl-6Glc <sup>2</sup> -Glc                             | O-Glc                                     | CH <sub>3</sub> |
| 32  | Quinquenoside II        | Octenoyl-Glc <sup>2</sup> -Glc                              | O-Glc <sup>6</sup> -Glc                   | CH <sub>3</sub> |
| 33  | Quinquenoside III       | Glc <sup>2</sup> -Glc                                       | O-Glc                                     | CH <sub>3</sub> |
| 34  | Quinquenoside V         | Glc <sup>2</sup> -Glc                                       | O-Glc <sup>6</sup> -Glc <sup>4</sup> -Glc | CH <sub>3</sub> |
| 35  | 20(S)-protopanadiol     | H                                                           | CH <sub>3</sub>                           | OH              |
| 36  | 20(R)-protopanadiol     | H                                                           | OH                                        | CH <sub>3</sub> |

| No. | Name                         | R1                    | R2                       | R3              |
|-----|------------------------------|-----------------------|--------------------------|-----------------|
| 37  | Ginsenoside Re               | Glc <sup>2</sup> -Rha | O-Glc                    | CH <sub>3</sub> |
| 38  | Ginsenoside Rg1              | Glc                   | O-Glc                    | CH <sub>3</sub> |
| 39  | 20(S)-Ginsenoside Rh1        | Glc <sup>2</sup> -Rha | OH                       | CH <sub>3</sub> |
| 40  | 20(R)-Ginsenoside Rh1        | Glc <sup>2</sup> -Rha | CH <sub>3</sub>          | OH              |
| 41  | 20(S)-Ginsenoside Rg2        | Glc <sup>2</sup> -Glc | OH                       | CH <sub>3</sub> |
| 42  | 20(R)-Ginsenoside Rg2        | Glc <sup>2</sup> -Glc | CH <sub>3</sub>          | OH              |
| 43  | Ginsenoside F1               | Glc                   | O-Glc                    | CH <sub>3</sub> |
| 44  | Ginsenoside F3               | H                     | O-Glc                    | CH <sub>3</sub> |
| 45  | Ginsenoside Rf               | H                     | O-Glc <sup>6</sup> -arap | CH <sub>3</sub> |
| 46  | Notoginsenoside R1           | Glc <sup>2</sup> -xyl | O-Glc                    | CH <sub>3</sub> |
| 47  | Notoginsenoside R2           | Glc <sup>2</sup> -xyl | OH                       | CH <sub>3</sub> |
| 48  | Quinquenoside L17            | Glc                   | O-Glc <sup>6</sup> -xyl  | CH <sub>3</sub> |
| 49  | Quinquenoside F6             | Glc                   | O-Glc <sup>6</sup> -araf | CH <sub>3</sub> |
| 50  | 6'-O-acetyl-Ginsenoside Rg1  | Glc <sup>6</sup> -AC  | O-Glc                    | CH <sub>3</sub> |
| 51  | 20(S)-acetyl-Ginsenoside Rg2 | Glc-Rha               | OH                       | CH <sub>3</sub> |
| 52  | 20(R)-acetyl-Ginsenoside Rg2 | Glc-Rha               | CH <sub>3</sub>          | OH              |
| 53  | 20(S)-protopanaxtriol        | H                     | OH                       | CH <sub>3</sub> |
| 54  | 20(R)-protopanaxtriol        | H                     | CH <sub>3</sub>          | OH              |

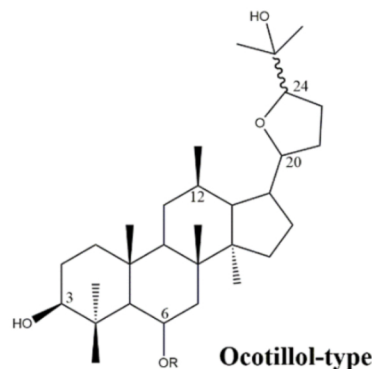

| No. | Name                        | R                                     |
|-----|-----------------------------|---------------------------------------|
| 58  | 24(S)-Pseudoginsenoside F11 | Glc <sup>2</sup> -Rha                 |
| 59  | 24(R)-Pseudoginsenoside F11 | Glc <sup>2</sup> -Rha                 |
| 60  | Ocotillol                   | H                                     |
| 61  | Pseudoginsenoside RT4       | Glc                                   |
| 62  | 24(R)-pseudoginsenoside RT5 | Glc                                   |
| 63  | Vinaginsenoside R1          | Glc <sup>2</sup> -Rha<br> <br>6<br>Ac |

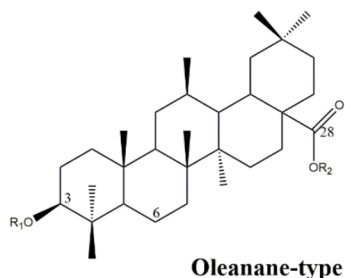

| No. | Name             | R1                     | R2  |
|-----|------------------|------------------------|-----|
| 55  | Ginsenoside Ro   | GlcA <sup>2</sup> -Glc | Glc |
| 56  | Quinquenoside R3 | Glc <sup>3</sup> -Glc  | Glc |
| 57  | Quinquenoside R4 | Glc <sup>2</sup> -Glc  | Glc |

**Fig. S1:** The chemical compounds in american ginseng

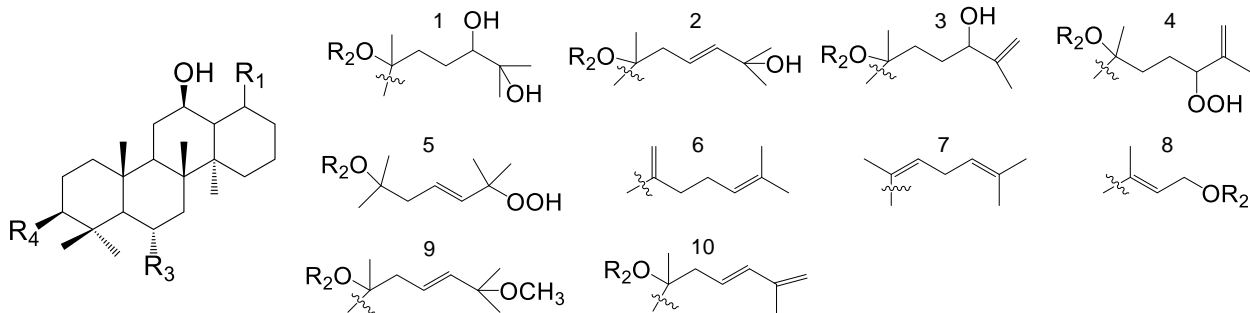

C17 side-chain varied PPD/PPT-type

| N O. | Name                 | R 1 | R2       | R3                                               | R4       | NO. | Name                 | R 1 | R2      | R3       | R4       |
|------|----------------------|-----|----------|--------------------------------------------------|----------|-----|----------------------|-----|---------|----------|----------|
| 64   | Quinquenoside F1     | 1   | H        | H                                                | OGlc-Glc | 82  | Ginsenoside II       | 4   | Glc     | H        | OGlc-Glc |
| 65   | Quinquenoside F2     | 1   | H        | H                                                | OGlc-Glc | 83  | Notoginsenoside C    | 4   | Glc-Glc | H        | OGlc-Glc |
| 66   | Quinquenoside F3     | 1   | Glc-Xyl  | H                                                | OGlc-Glc | 84  | Floraquinquenoside A | 5   | H       | OGlc     | OH       |
| 67   | Quinquenoside F4     | 1   | H        | <sup>-OGlc<sup>2-1</sup>Glc</sup> <sub>Rha</sub> | OH       | 85  | Floraquinquenoside C | 5   | H       | OGlc-Rha | OH       |
| 68   | Quinquenoside L9     | 1   | H        | OGlc-Rha                                         | OH       | 86  | Notoginsenoside E    | 5   | Glc     | H        | OGlc-Glc |
| 69   | Quinquenoside L16    | 1   | OGlc-Glc | H                                                | OGlc-Glc | 87  | Notoginsenoside K    | 5   | Glc-Glc | H        | OGlc-Glc |
| 70   | Gypenoside LXIX      | 2   | Glc-Xyl  | H                                                | OGlc-Glc | 88  | Ginsenoside Rg6      | 6   | /       | OGlc-Rha | OH       |
| 71   | Notoginsenoside A    | 2   | Glc-Glc  | H                                                | OGlc-Glc | 89  | Ginsenoside Rh4      | 6   | /       | OGlc     | OH       |
| 72   | Quinquenoside L3     | 2   | Glc-Xyl  | H                                                | OGlc     | 90  | Ginsenoside Rk1      | 6   | /       | H        | OGlc-Glc |
| 73   | Quinquenoside L7     | 2   | Glc-Xyl  | H                                                | OGlc-Glc | 91  | Ginsenoside Rk2      | 6   | /       | H        | OGlc     |
| 74   | Vinaginsenoside R8   | 2   | Glc      | H                                                | OGlc-Glc | 92  | Ginsenoside Rk3      | 6   | /       | OGlc     | OH       |
| 75   | Gypenoside LXXI      | 3   | Glc-Glc  | H                                                | OGlc-Glc | 93  | Ginsenoside F4       | 7   | /       | OGlc-Rha | OH       |
| 76   | Majoroside F1        | 3   | Glc      | H                                                | OGlc-Glc | 94  | Ginsenoside Rh3      | 7   | /       | H        | OGlc     |
| 77   | Majoroside F2        | 3   | Glc      | H                                                | OGlc     | 95  | Quinquenoside L13    | 7   | /       | H        | OGlc-Glc |
| 78   | Quinquenoside B      | 3   | H        | H                                                | OGlc     | 96  | Quinquenoside L12    | 8   | Glc     | H        | OGlc-Glc |
| 79   | Floraquinquenoside B | 4   | H        | OGlc-Rha                                         | OH       | 97  | Quinquenoside L15    | 8   | H       | H        | OGlc-Glc |
| 80   | Floraquinquenoside D | 4   | Glc      | H                                                | OGlc     | 98  | Quinquenoside Lc     | 9   | Glc-Xyl | H        | OGlc-Glc |
| 81   | Ginsenoside I        | 4   | Glc      | H                                                | Glc-Glc  | 99  | Quinquenoside L1     | 10  | Glc     | H        | OGlc-Glc |

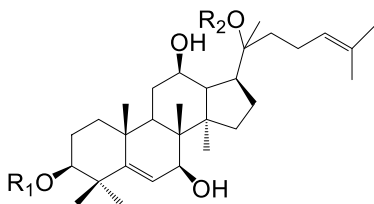

| NO. | Name              | R1      | R2      |
|-----|-------------------|---------|---------|
| 100 | Notoginsenoside G | Glc-Glc | Glc     |
| 101 | Quinquenoside IV  | Glc-Glc | Glc-Glc |

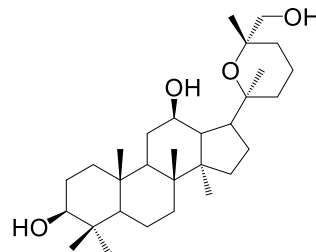

102 Dammar-20S,25S-epoxy-3β,12β,26-triol

Others

Fig. S2: The chemical compounds in american ginseng
